# Supplementary material
Source: publisher site journal article supplement (https://www.dovepress.com/get_supplementary_file.php?f=450866.docx)

**Supplementary figure 1. Expression of TLR genes through stimulation with rAc-PF *in vitro*.** TLR expression level using rAc-PF treatment in MLE 12 cells (A). The expression level of inflammation related genes in the rAc-PF only and TLRs antagonist pre-treated groups (B). (n = 5/group, three independent experiments).


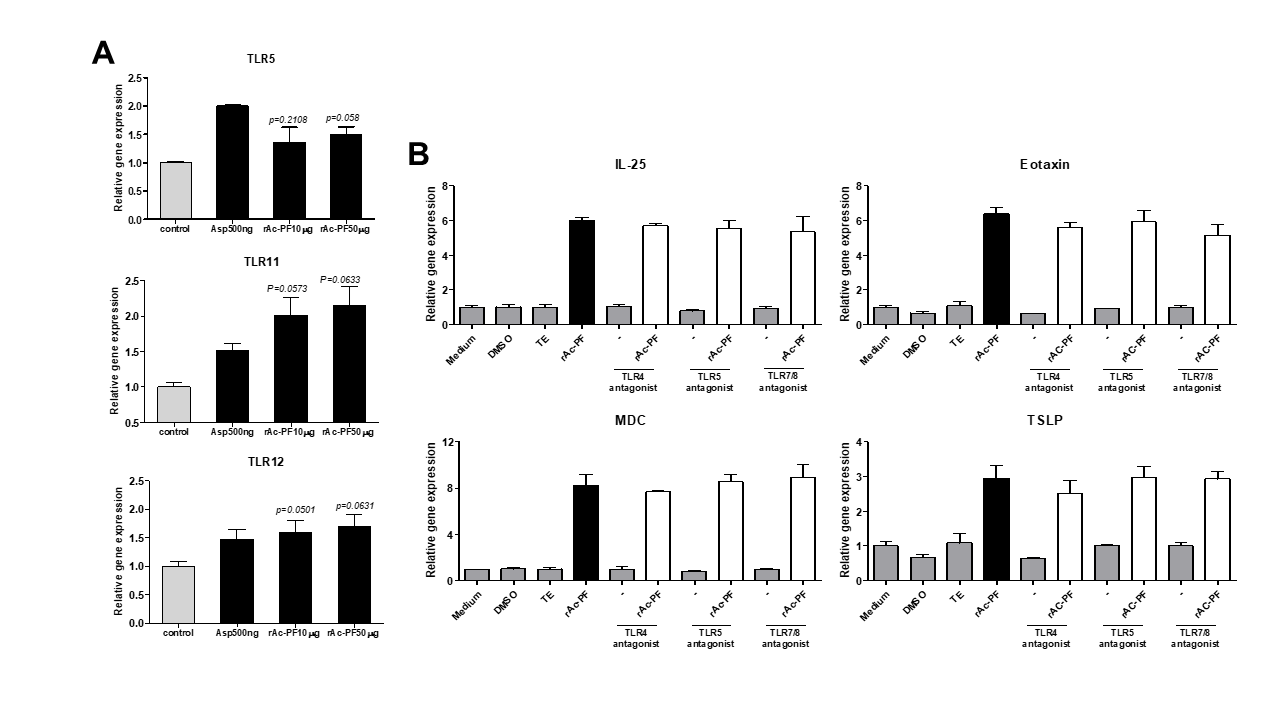

Supplement: Supplementary file 1 [file get_supplementary_file.php]
